# Supplementary material for: The Noise Exposure Structured Interview (NESI): An Instrument for the Comprehensive Estimation of Lifetime Noise Exposure
Source: Trends Hear. 2018 Oct 8;22:2331216518803213. doi: 10.1177/2331216518803213 (PMC6176535; doi:10.1177/2331216518803213)
Supplement: Supplemental material3 - Supplemental material for The Noise Exposure Structured Interview (NESI): An Instrument for the Comprehensive Estimation of Lifetime Noise Exposure [file Supplemental_material3.xlsx]

## Sheet: Standard calculation
		Category A: Recreational noise exposure
		R1	R2	R3	R4	R5	R6	R7	R8	R9	R10	R11	R12	R13	R14	R15	R16	R17	R18	R19	R20
Level	Estimated sound level (dBA)	93	105	93	93	99	105	88
Duration	Years	4	4	12	18	18	8	18
	Weeks per year	40	12	24	1	6	8	52
	Days per week	1	1	1	3	1	1	5
	Hours per day	5	3	4	10	3	1.5	0.5
	Total hours	800	144	1152	540	324	96	2340	0	0	0	0	0	0	0	0	0	0	0	0	0
	Hours / 2080	0.384615	0.0692308	0.553846	0.259615	0.155769	0.0461538	1.125	0	0	0	0	0	0	0	0	0	0	0	0	0
Hearing protection	Estimated attenuation (dB)				18	18	28
	Proportion of time worn (0 to 1)				0.25	0.5	0.8
Units of noise exposure		0.767409	2.18927	1.10507	0.388501	0.628465	0.291903	0.709827	0	0	0	0	0	0	0	0	0	0	0	0	0
		Category B: Occupational and educational noise exposure
		O&E1	O&E2	O&E3	O&E4	O&E5	O&E6	O&E7	O&E8	O&E9	O&E10	O&E11	O&E12	O&E13	O&E14	O&E15	O&E16	O&E17	O&E18	O&E19	O&E20
Level	Estimated sound level (dBA)	99	87
Duration	Years	4	4
	Weeks per year	10	10
	Days per week	5	5
	Hours per day	4	2
	Total hours	800	400	0	0	0	0	0	0	0	0	0	0	0	0	0	0	0	0	0	0
	Hours / 2080	0.384615	0.192308	0	0	0	0	0	0	0	0	0	0	0	0	0	0	0	0	0	0
Hearing protection	Estimated attenuation (dB)
	Proportion of time worn (0 to 1)
Units of noise exposure		3.05511	0.0963822	0	0	0	0	0	0	0	0	0	0	0	0	0	0	0	0	0	0
		Category C: Firearm noise exposure
		F1	F2	F3	F4	F5	F6	F7	F8	F9	F10	F11	F12	F13	F14	F15	F16	F17	F18	F19	F20
Low calibre (.22 or .17) rifle?		FALSE	TRUE	FALSE	FALSE	FALSE	FALSE	FALSE	FALSE	FALSE	FALSE	FALSE	FALSE	FALSE	FALSE	FALSE	FALSE	FALSE	FALSE	FALSE	FALSE
Total number of rounds		100	100
Units of noise exposure		0.2	0.00625	0	0	0	0	0	0	0	0	0	0	0	0	0	0	0	0	0	0
Recreational units:		6.08044
Occupational and educational units:		3.15149
Firearm units:		0.20625
TOTAL UNITS OF NOISE EXPOSURE:		9.43818
NESI Version 1, May 2018
