# Supplementary material for: The Noise Exposure Structured Interview (NESI): An Instrument for the Comprehensive Estimation of Lifetime Noise Exposure
Source: PubMed Central journal article supplement (PMC6176535; doi:10.1177/2331216518803213), 2018-10-08
Supplement: Supplemental_material1.pdf [file Supplemental_material1.pdf]

|                                                                     |                                              |  |  |  |  |  |  |  |  |
|---------------------------------------------------------------------|----------------------------------------------|--|--|--|--|--|--|--|--|
| Exposure activity                                                   |                                              |  |  |  |  |  |  |  |  |
| Timing of exposure period<br>(e.g. age at start and age at end)     |                                              |  |  |  |  |  |  |  |  |
| Exposure duration                                                   | Years                                        |  |  |  |  |  |  |  |  |
|                                                                     | Weeks per year                               |  |  |  |  |  |  |  |  |
|                                                                     | Days per week                                |  |  |  |  |  |  |  |  |
|                                                                     | Hours per day                                |  |  |  |  |  |  |  |  |
| Exposure level                                                      | Basis for estimate                           |  |  |  |  |  |  |  |  |
|                                                                     | Estimated level (dBA)                        |  |  |  |  |  |  |  |  |
| <b>Optional:</b><br>Exposure level<br>(alternate estimation method) | Basis for estimate                           |  |  |  |  |  |  |  |  |
|                                                                     | Estimated level (dBA)                        |  |  |  |  |  |  |  |  |
| Use of hearing protection                                           | Proportion of time worn<br>(between 0 and 1) |  |  |  |  |  |  |  |  |
|                                                                     | Notes on type and attenuation of protector   |  |  |  |  |  |  |  |  |
|                                                                     | Estimated attenuation (dB)                   |  |  |  |  |  |  |  |  |

**ID:**

**Date:**

|                                                                     |                                              |  |  |  |  |  |  |  |  |
|---------------------------------------------------------------------|----------------------------------------------|--|--|--|--|--|--|--|--|
| Exposure activity                                                   |                                              |  |  |  |  |  |  |  |  |
| Timing of exposure period<br>(e.g. age at start and age at end)     |                                              |  |  |  |  |  |  |  |  |
| Exposure duration                                                   | Years                                        |  |  |  |  |  |  |  |  |
|                                                                     | Weeks per year                               |  |  |  |  |  |  |  |  |
|                                                                     | Days per week                                |  |  |  |  |  |  |  |  |
|                                                                     | Hours per day                                |  |  |  |  |  |  |  |  |
| Exposure level                                                      | Basis for estimate                           |  |  |  |  |  |  |  |  |
|                                                                     | Estimated level (dBA)                        |  |  |  |  |  |  |  |  |
| <b>Optional:</b><br>Exposure level<br>(alternate estimation method) | Basis for estimate                           |  |  |  |  |  |  |  |  |
|                                                                     | Estimated level (dBA)                        |  |  |  |  |  |  |  |  |
| Use of hearing protection                                           | Proportion of time worn<br>(between 0 and 1) |  |  |  |  |  |  |  |  |
|                                                                     | Notes on type and attenuation of protector   |  |  |  |  |  |  |  |  |
|                                                                     | Estimated attenuation (dB)                   |  |  |  |  |  |  |  |  |

**ID:**

**Date:**

|                                                         |  |  |  |  |  |  |  |  |
|---------------------------------------------------------|--|--|--|--|--|--|--|--|
| Type of firearm                                         |  |  |  |  |  |  |  |  |
| Additional information to assist recall                 |  |  |  |  |  |  |  |  |
| Total number of rounds fired without hearing protection |  |  |  |  |  |  |  |  |

**Summary information**

|                             | Category A:<br>Recreational noise | Category B: Occupational<br>and educational noise | Category C:<br>Firearm noise | Total |
|-----------------------------|-----------------------------------|---------------------------------------------------|------------------------------|-------|
| Number of worksheets used   |                                   |                                                   |                              |       |
| Person conducting interview |                                   |                                                   |                              |       |
